# Supplementary material for: Using a high density bin map to analyze quantitative trait locis of germination ability of maize at low temperatures
Source: Frontiers journal article supplement (doi:10.3389/fpls.2022.978941), 2022-08-22
Supplement: Data_Sheet_1.zip [file Data_Sheet_1.zip]

## Sheet: Supplementary Table 1
Supplementary Table 1 Genetic markers of the target segment CSSL individuals
Marker	Bin	Physical distance (bp)
umc1611	1.05	156,173,806-164,248,832
umc1754	1.06	180,248,365-180,709,406
umc1590	1.06	182,926,541-182,927,313
umc1396	1.06	191,089,609-191,089,856
umc2235	1.06	191,472,282-191,473,052
umc1664	1.06	192,933,927-194,756,455
umc1709	1.06	195,557,657-195,559,534
umc1254	1.06	200,400,148-201,559,637
umc2237	1.07	201,422,957-202,309,014
umc2505	1.07	206,699,769-207,159,843

## Sheet: Supplementary Table 2
Supplementary Table 2 Phenotypic values of lines for qRT-PCR
Number	Name	RGR	Resistance	Source
1	Ye478	0.845	tolerant	Parent
2	Qi319	0.449	sensitive	Parent
3	ZYQ219	0.87	tolerant	RILs
4	ZYQ011	0.32	sensitive	RILs
5	CL082	0.86	tolerant	CSSLs
6	CL018	0.34	sensitive	CSSLs

## Sheet: Supplementary Table 3
Supplementary Table 3 Gene-specific primers used for qRT-PCR
Genes	Forward primer	Reverse primer
Actin	5’GTTGGGCGTCCTCGTCA3’	5’TGGGTCATCTTCTCCCTGTT3’
GRMZM2G082630	5’GCACGGTGTACAAGGCGAAG3’	5’GTAGTCGTACACCAGCAGCTT3’
GRMZM2G115730	5’CCGCCTCGTCGAATTACAAG3’	5’CAAGGACAAGGAACCGAGC3’

## Sheet: Supplementary Table 4
Supplementary Table 4 ANOVA and heritability for eight low-temperature tolerance traits for the RIL population.
Trait	Variance			Broad-sense heritability (%)
	Genotype	Environment	Error
RGR	0.102***	0.018***	0.001	84.8
RSL	0.176***	0.035***	0.001	83.6
RRL	0.796***	0.082***	0.005	90.7
RTL	0.303***	0.060***	0.006	83.4
RRSA	0.764***	0.091***	0.005	89.4
RRAD	0.004***	0.001***	0.001	83.7
RRV	0.985***	0.144***	0.016	87.3
RSVI	0.238***	0.051***	0.004	82.4
Note: ***, P＜0.001

## Sheet: Supplementary Table 5
Supplementary Table 5 QTL identified for eight normal traits of maize
No.	QTL Name	Chr	Flanking markers	Interval (Mb)	Physical length (Mb)	LOD	phenotype
1	qNSL1-1	1	mk455-mk457	199.35-199.95	0.6	3.53	NSL
2	qNRL1-1	1	mk95-mk97	18.15-18.45	0.3	3.07	NRL
3	qNRSA1-1	1	mk453-mk455	199.1-199.35	0.25	4.72	NRSA
4	qNRV1-1	1	mk103-mk105	19.45-19.85	0.4	3.07	NRV
5	qNRAD2-1	2	mk1178-mk1180	234.15-234.8	0.65	3.51	NRAD
6	qNRL3-1	3	mk1226-mk1228	7.9-8.15	0.25	2.69	NRL
7	qNGR4-1	4	mk1767-mk1769	6.6-6.95	0.35	4.09	NGR
8	qNSL5-1	5	mk2727-mk2729	210.6-211	0.4	3.34	NSL
9	qNRL5-1	5	mk2674-mk2676	199.8-200.3	0.5	3.03	NRL
10	qNRL7-1	7	mk3508-mk3510	162.75-163.05	0.3	6.34	NRL
11	qNTL7-1	7	mk3515-mk3517	164.05-164.55	0.5	2.91	NTL
12	qNRV7-1	7	mk3434-mk3436	147.45-148.55	1.1	3.4	NRV
13	qNSVI7-1	7	mk3515-mk3517	164.05-164.55	0.5	2.65	NSVI
14	qNSL8-1	8	mk3677-mk3679	76.85-79.65	2.8	4.1	NSL
15	qNRAD8-1	8	mk3842-mk3844	158.7-159.15	0.45	4.76	NRAD
16	qNGR10-1	10	mk4459-mk4461	96.05-96.9	0.85	2.67	NGR
17	qNSL10-1	10	mk4472-mk4474	107.3-109.65	2.35	4.17	NSL
18	qNTL10-1	10	mk4467-mk4469	103.25-105.4	2.15	4.25	NTL
19	qNSVI10-1	10	mk4467-mk4469	103.25-105.4	2.15	3.73	NSVI

## Sheet: Supplementary Table 6
Supplementary Table 6 QTL associated with low-temperature tolerance in maize germination
No.	Type of population	Size of population	Traits	Chromosome	Location (cM)	Location in left (cM)	Location in right (cM)	Map distance (cM)	Phenotypic variation	References
1	RIL(B73×Mo17)	243	RGR	4	276.09	270.3	281.88	11.58	3.39	(Hu et al. 2016)
2			RRL	4	276.09	270.3	281.88	11.58	3.96
3			RGR	5	281.65	280.8	282.5	1.7	11.29
4			RRL	5	281.65	280.8	282.5	1.7	5.39
5			RGR	5	484.44	476.6	492.28	15.68	5.7
6			RRL	5	484.44	476.6	492.28	15.68	8.11
7			RRL	6	102.05	96	108.1	12.1	7.03
8			RGR	6	540.67	513.8	567.53	53.73	3.89
9			RRL	6	540.67	513.8	567.53	53.73	5.17
10			RGR	7	295.52	290.2	300.84	10.64	5.72
11			RGR	9	532.82	528.9	536.73	7.83	5.25
12			RRL	9	532.82	528.9	536.73	7.83	8.41
13	F2:3(EP42×A661)		RGR	4	150.84	75.98	225.7	149.72	6	(Rodrı´guez et al. 2014)
14	F2:3(P9-10×PH4CV)	215	RTL	1	217.7	210.6	224.8	14.2	6.13	(Li et al. 2018)
15			RSL	1	213.07	205.73	220.4	14.67	4.1
16			RTL	1	586.74	471.7	701.77	230.07	39.44
17			RRL	1	586.12	471.7	700.53	228.83	18.98
18			RSL	1	586.12	471.7	700.53	228.83	38.72
19			RRL	2	346.94	346.92	346.96	0.04	6.64
20			RTL	9	409.97	317.61	502.33	184.72	5.04
21			RSL	9	409.97	317.61	502.33	184.72	4.71
22			RGR	10	257.23	253.5	260.95	7.45	15.53
23			RGI	10	257.23	253.5	260.95	7.45	9.89
24	F2:3(220×PH4CV)	223	RSL	1	408.06	395.55	420.57	25.02	4.53
25			RSL	1	441.39	438.8	443.98	5.18	4.64
26			RTL	1	520.54	487.47	553.6	66.13	33.01
27			RGR	1	537.3	517	557.6	40.6	10.18
28			RRL	1	539	520.4	557.6	37.2	26.1
29			RSL	1	539.8	522	557.6	35.6	28.18
30			RGR	1	814.42	812.3	816.54	4.24	4.05
31			RGI	2	375.93	373.57	378.29	4.72	18.21
32			RGI	3	200.25	169	231.5	62.5	0.62
33			RRL	4	302.85	295	310.7	15.7	5.37
34			RGR	5	318.58	317.18	319.98	2.8	6.9
35			RGR	5	319.28	318.58	319.98	1.4	16.38
36			RGI	5	319.28	318.58	319.98	1.4	0.74
37			RGR	9	237.82	235.61	240.02	4.41	4.47
38			RGI	9	235.81	235.61	236	0.39	0.82
39			RSL	9	240.21	240.02	240.4	0.38	3.18
40			RSL	9	465.12	427.9	502.33	74.43	3.02
41			RTL	10	189.65	170.01	209.29	39.28	5.02
42			RRL	10	189.65	170.01	209.29	39.28	7.05
43	F2:3(220×Y1518)	212	RGI	2	353.23	352.85	353.61	0.76	6.16
44			RTL	2	361.1	361	361.2	0.2	9.83
45			RSL	2	365.53	361	370.06	9.06	12.31
46			RGR	2	375.93	373.57	378.29	4.72	4.81
47			RGR	3	839.95	829.9	850	20.1	9.1
48			RGI	3	839.95	829.9	850	20.1	11.22
49			RSL	3	862.46	850	874.91	24.91	15.17
50			RRL	8	583.99	571.5	596.48	24.98	17.97
51			RRL	8	608.29	600.58	615.99	15.41	10.44
52			RSL	8	656.56	640	673.12	33.12	6.72
53			RGR	9	238.8	238.24	239.35	1.11	13.73
54			RGI	9	238.8	238.24	239.35	1.11	21.46
55			RRL	9	250.92	249.2	252.63	3.43	2.03
56	RIL(Ye478×Qi319)	365	RSVI	1	356.33	351.6	361.06	9.46	7.8	This study
57			RGR	1	356.57	352.08	361.06	8.98	13.52
58			RGR	1	610.1	593.8	626.4	32.6	8.05
59			RRSA	1	609.7	593.8	625.6	31.8	5.18
60			RSL	1	612.4	598.4	626.4	28	6.06
61			RRL	1	612.4	598.4	626.4	28	17.01
62			RTL	1	612.4	598.4	626.4	28	20.36
63			RRV	1	614.5	598.4	630.6	32.2	8.44
64			RSVI	1	614.5	598.4	630.6	32.2	25.96
65			RRL	3	103.04	100	106.08	6.08	3.58
66			RTL	3	101.35	101.3	101.4	0.1	3.79
67			RSL	3	183.86	177.52	190.2	12.68	4.23
68			RSL	3	380.81	369.61	392	22.39	6.47
69			RRAD	3	608.16	597.6	618.72	21.12	8.37
70			RRL	7	37.17	5.92	68.42	62.5	7.14
71			RTL	7	76.42	53.6	99.23	45.63	6.39
72			RSVI	7	78.63	54.8	102.46	47.66	3.59
73			RRAD	8	422.08	411.76	432.4	20.64	5.54
74			RGR	9	14.74	0	29.47	29.47	5.07
75			RGR	10	397.16	392.4	401.91	9.51	4.56
76	CSSL(Ye478×Qi319)	13	RGR	1	623.9	617.2	630.6	13.4	-	This study

## Sheet: Supplementary Table 7
Supplementary Table 7 The homology and annotation information of candidate genes
Number	Genes ID	Gene Annotation Function	B73 RefGen_v3 Position /bp	Species	Specific Annotation Function	Specific Biological Function	References
1	GRMZM2G082630	Transcription factor bHLH30	200448170..200449019	Arabidopsis thaliana	bHLH DNA-binding domain superfamily protein	Stress responses and plant growth, development and light signal transduction	(Friedrichsen et al., 2002; Abe et al., 2003; Castelain et al., 2012; Liu et al., 2013; Yao et al., 2018)
				Oryza sativa	basic Helix Loop Helix (bHLH) domain	Response to salt stress and other abiotic stresses	(Chen et al., 2017)
				Nicotiana tabacum	highly conserved bHLH domain protein	Enhanced resistance under low-temperature stress	(Zhao et al., 2018)
				Sorghum bicolor	bHLH domain protein	Regulate six different abiotic stresses including cold	(Fan et al., 2021)
2	GRMZM2G115730	ENTH/VHS family protein	201519254..201520692	Arabidopsis thaliana	ENTH/VHS domain superfamily protein	Involved in clathrin-related endomembrane trafficking in plants	(Zouhar and Sauer, 2014)
				Oryza sativa	ENTH domain protein	Respond to NaCl, PEG and other abiotic stresses	(Wang et al., 2017)
3	GRMZM2G082640	PWWP domain protein	200434717..200444930	Arabidopsis thaliana	Tudor/PWWP/MBT superfamily protein	Respond abscisic acid signaling	(Yang et al., 2020)
				Oryza sativa	PWWP domain containing protein expressed
4	GRMZM2G082573	programmed cell death protein 2	200455729..200460521	Arabidopsis thaliana	transcription regulators
				Oryza sativa	CCR4-Not complex component Not1domain containing protein expressed	mRNA deadenylation	(chou et al., 2016)
5	GRMZM2G157010	UPF0029 domain-containing protein	200505932..200515174	Arabidopsis thaliana	Ribosomal protein S5 domain 2-like superfamily protein	Regulation of cell proliferation affects developmental phenotypic changes	(Weijers et al., 2001)
				Oryza sativa	uncharacterized protein YigZ family putative expressed
6	GRMZM2G157018	ATP synthase subunit d, mitochondrial	200515885..200519054	Arabidopsis thaliana	(ATPQ) ATP synthase D chain mitochondrial
				Oryza sativa	expressed protein
7	GRMZM5G830293	uncharacterized protein	200526989..200533596	Arabidopsis thaliana	myb-like HTH transcriptional regulator family protein
				Oryza sativa	Myb-like DNA-binding domain containing protein putative expressed
8	AC209845.4_FG010	AT-hook motif nuclear-localized protein 17	200534561..200535445	Arabidopsis thaliana	A-T hook DNA binding family proteins	Regulates flowering	(Yun et al., 2012)
				Oryza sativa	DNA binding protein	Response drought tolerance	(Zhou et al., 2016)
9	GRMZM2G067845	uncharacterized protein	200536283..200536525	Arabidopsis thaliana	Enhancer of polycomb-like transcription factor protein	Inhibition of growth and chloroplast development	(Bieluszewski et al., 2022)
				Oryza sativa	expressed protein
10	GRMZM2G367829	uncharacterized LOC103645212	200578056..200579535	Arabidopsis thaliana	Replicator A protein 1 correlates
				Oryza sativa	Expressed Protein
11	GRMZM2G136443	ubiquitin carboxyl-terminal hydrolase 17-like	200655133..200664592	Arabidopsis thaliana	ubiquitin carboxyl-terminal hydrolase 17-like
				Oryza sativa	putative ubiquitin carboxyl-terminal hydrolase superfamily protein
12	GRMZM2G436593	mitochondrial 2-oxoglutarate/malate carrier protein	200669882..200671531	Arabidopsis thaliana	mitochondrial 2-oxoglutarate/malate carrier protein	Response Photorespiration.	(Taniguchi et al., 2002)
				Oryza sativa	mitochondrial carrier protein	Promotes mitochondrial gene expression	(Taylor et al., 2010)
13	GRMZM2G152156	Maltose excess protein 1 chloroplastic	200749036..200755504	Arabidopsis thaliana	Root cap 1	Root development	(del Campillo et al., 2004)
				Oryza sativa	Maltose excess protein 1 chloroplastic
14	GRMZM2G133413	cyclin-D4-2-like	200759175..200759183	Arabidopsis thaliana	D-type cyclin	Influences Cell Division	(Zheng et al., 2021)
				Oryza sativa	Cyclin	Regulate branch formation in rice	(Ohyama et al., 2022)
15	GRMZM2G157772	UDP-glucuronic acid decarboxylase 6	200865263..200867080	Arabidopsis thaliana	UDP - XYL synthase (6)	Encodes an alpha-xylosyltransferase activity involved in xyloglucan biosynthesis.	(Faik et al., 2002)
				Oryza sativa	NAD relies on the differential isomerase/dehydrase family of proteins
16	GRMZM2G346920	uncharacterized LOC100283050	200897499..200899336	Arabidopsis thaliana	(ATHB22,HB22,MEE68) homolobox protein 22
				Oryza sativa	ZF-HD homolobox protein	Regulates flowering	(Tan et al., 2006)
17	GRMZM2G004079	putative calcium-dependent protein kinase family protein	201226717..201229957	Arabidopsis thaliana	Serine/threonine-protein kinase PEPKR2
				Oryza sativa	putative calcium-dependent protein kinase family protein	Growth promotion in rice	(Ribaudo et al., 2017)
18	GRMZM2G419024	Uncharacterized conserved protein UCP031088 alpha/beta hydrolase	201439240..201445286	Arabidopsis thaliana	conserved protein UCP031088 alpha/beta hydrolase
				Oryza sativa	Expressed Protein
19	GRMZM5G899800	uncharacterized LOC100272324	201502394..201505169	Arabidopsis thaliana	Structural maintenance of chromosomes (SMC) family protein	Reproductive development	(Zou et al., 2021)
				Oryza sativa	RecF/RecN/SMC N-terminal domain protein
20	GRMZM2G416069	uncharacterized LOC100272324	201513870..201519179	Arabidopsis thaliana	Structural maintenance of chromosomes (SMC) family protein	Reproductive development	(Zhou et al., 2021)
				Oryza sativa	RecF/RecN/SMC N-terminal domain protein
21	GRMZM2G115750	uncharacterized LOC100276220	201522268..201525873	Arabidopsis thaliana	(PMP)1 type membrane protein	Promotes peroxisome function	(McDonnell et al., 2016)
				Oryza sativa	Expressed Protein
22	GRMZM2G017045	uncharacterized LOC100285080	201661039..201662079	Arabidopsis thaliana	Protein PROTON GRADIENT REGULATION 5, chloroplastic	Protecting photo-oxidative stress	(Kameoka et al., 2021)
				Oryza sativa	Expressed PGR5 Protein	Regulate photosynthesis	(Nishikawa et al., 2012)
23	GRMZM2G318803	probable inactive histone-lysine N-methyltransferase SUVR2	201662604..201667147	Arabidopsis thaliana	SDG13 / SUVR1 homologue
				Oryza sativa	SET domain protein	Saline-alkaline stress tolerance	(Liu et al., 2021)
24	GRMZM2G318794	mitochondrial import receptor subunit TOM22	201668883..201669657	Arabidopsis thaliana	(ATTOM22-V, TOM22-V, TOM9-2) translocase of outer membrane 22-V
				Oryza sativa	Expressed Protein
25	GRMZM2G016210	uncharacterized LOC100279181	201673513..201678322	Arabidopsis thaliana	uncharacterized (DUF239)
				Oryza sativa	carboxyl-terminal proteinase	Affects developmental growth of rice plants	(Moon et al., 2009)
26	GRMZM2G148867	GDSL esterase/lipase LTL1	201775585..201782559	Arabidopsis thaliana	GDSL-Type Esterase/Lipase Gene Family	Regulates pollen wall characteristics	(Tsugama et al., 2020)
				Oryza sativa	GDSL-Type Esterase/Lipase Gene Family	Regulate ethylene signaling for root growth	(Zhao et al., 2020)
