# Supplementary material for: Using a high density bin map to analyze quantitative trait locis of germination ability of maize at low temperatures
Source: Frontiers journal article supplement (doi:10.3389/fpls.2022.978941), 2022-08-22
Supplement: Data_Sheet_1.zip [file Data_Sheet_1.zip]

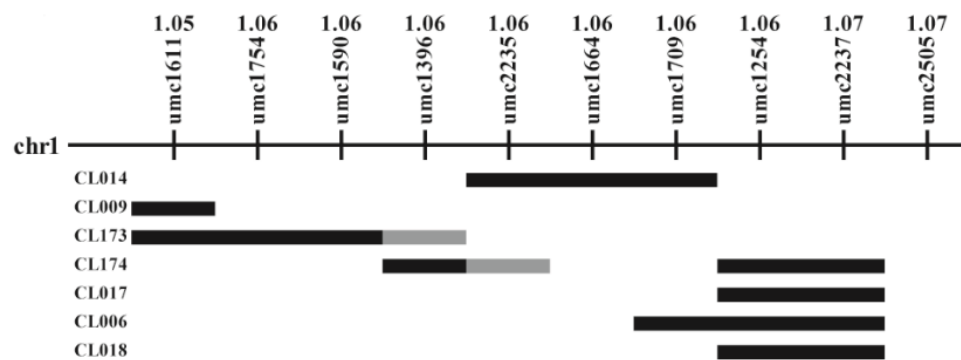

Supplementary Figure 1 Genotype of seven lines of CSSLs

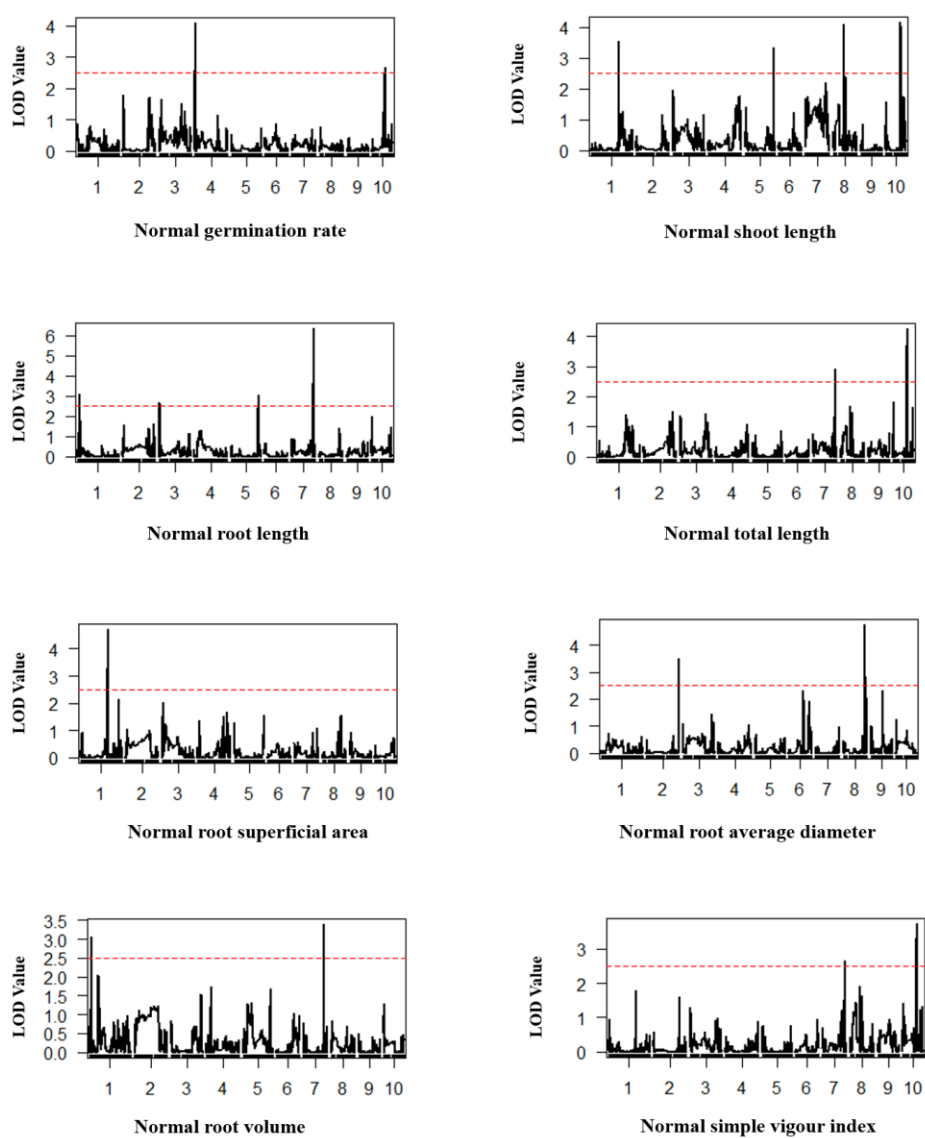

Supplementary Figure 2 QTL analysis in the RIL population the normal traits.

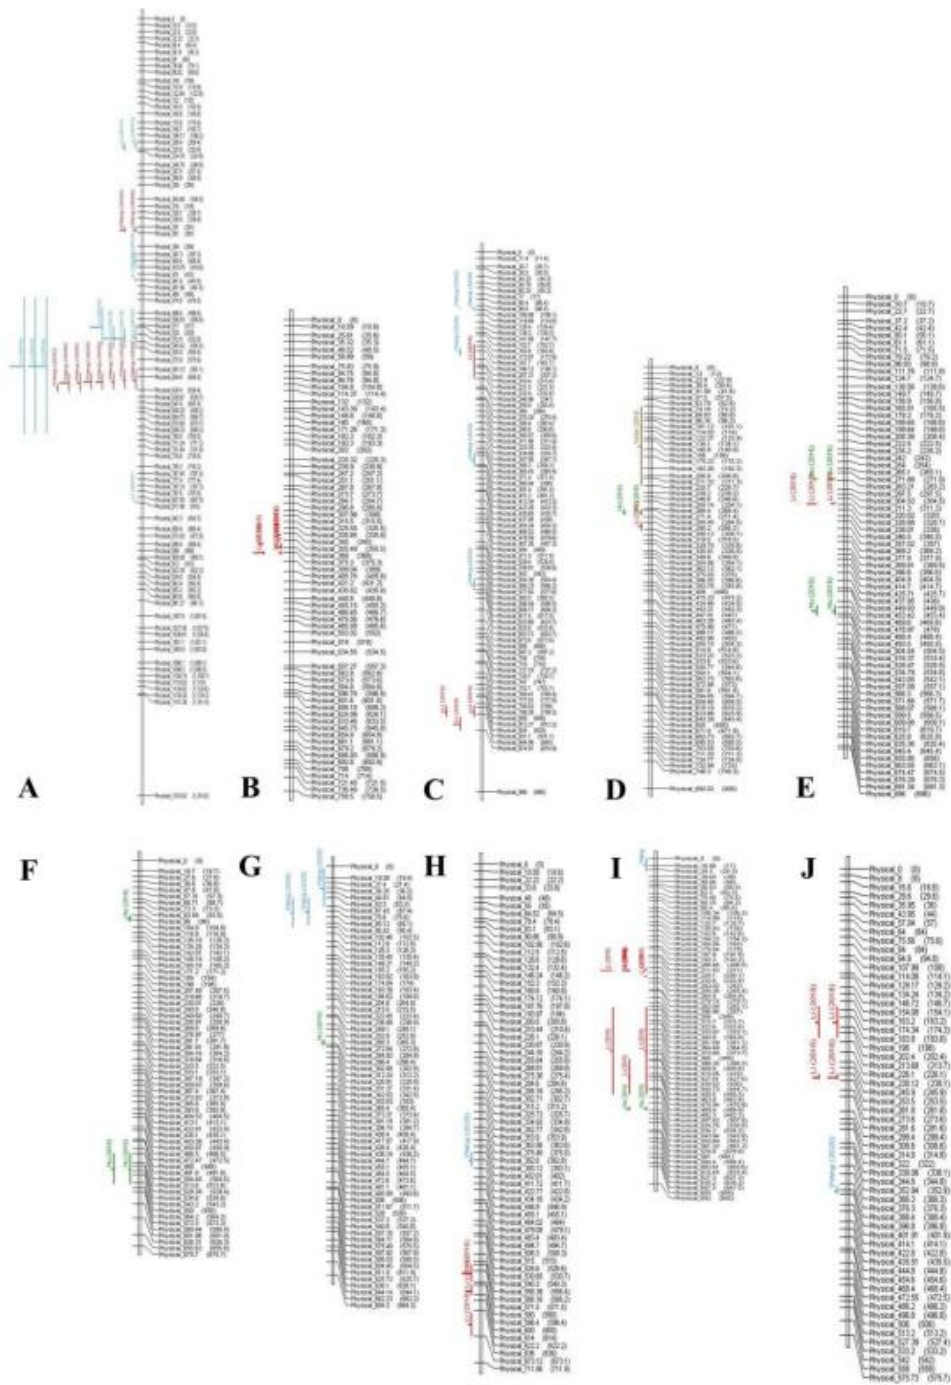

Supplementary Figure 3 Integrated map of QTLs for low-temperature tolerance related traits in maize.
